# Supplementary material for: Socio-Ecological Factors That Influence Infant and Young Child Nutrition in Kiribati: A Biocultural Perspective
Source: MDPI journal article supplement (doi:10.3390/nu11061330), 2019-06-13
Supplement: s1 [file s1]

## Kiribati Nutrition-WASH Formative Research Codebook for Qualitative Analysis

| Code                                      | Description                                                                                                                                                                             |
|-------------------------------------------|-----------------------------------------------------------------------------------------------------------------------------------------------------------------------------------------|
| Animals raised                            | Include descriptions of what animals are raised, where they are kept, and how feces are managed. Include challenges to raising animals and challenges to keeping them in a fenced area. |
| Barriers & facilitators to home gardens   | Include difficulties or facilitators to growing food and what families need in order to grow more food at home. Include social and behavioural influencers (eg. motivation).            |
| Breastfeeding                             | Include descriptions of breastfeeding practices such as when breastfeeding is initiated, duration of breastfeeding (both exclusive and continued)                                       |
| Barriers to BF                            | Include descriptions of general barriers to breastfeeding (eg. mothers returning to work).                                                                                              |
| Facilitators and barriers to BF 2 years   | Include descriptions of barriers and facilitators to continued breastfeeding to two years and beyond.                                                                                   |
| Facilitators and barriers to EBF 6 months | Include descriptions of barriers and facilitators to exclusive breastfeeding to six months of age.                                                                                      |
| Influence & advice on breastfeeding       | Include descriptions of influences and advice that caregivers receive on breastfeeding (eg. health workers' advice, influence from elders).                                             |
| Pre-lacteal feeding                       | Include descriptions of practices of giving other liquids to children in the first few days after birth. Include descriptions of these liquids.                                         |
| Child feeding                             | Include general descriptions of how children are fed such as: frequency of feeding, responsive feeding.                                                                                 |

| Code                                 | Description                                                                                                                                                                                                                                  |
|--------------------------------------|----------------------------------------------------------------------------------------------------------------------------------------------------------------------------------------------------------------------------------------------|
| Child feeding during illness         | Include descriptions of how children are fed during illness compared to normal feeding practices.                                                                                                                                            |
| Common foods                         | Include descriptions of common foods fed to children under two years.                                                                                                                                                                        |
| First foods or liquids               | Include descriptions of first foods and how they are prepared.                                                                                                                                                                               |
| First food influencers               | Include descriptions of opinions from others that influence caregivers' decision to introduce foods and liquids at that age.                                                                                                                 |
| Introduction of CF                   | Include descriptions of when complementary foods are first introduced to children.                                                                                                                                                           |
| Foods that shouldn't be given        | Include descriptions of foods that should not be given to children under two years.                                                                                                                                                          |
| Gender differences                   | Include descriptions of gender differences in child feeding or lack thereof.                                                                                                                                                                 |
| Important foods for children under 2 | Include descriptions of foods identified as important for children under two to be healthy and grow well.                                                                                                                                    |
| Influences & advice on child feeding | Include descriptions of influences and advice that affects caregivers' decisions around child feeding (eg. advice from elders, not enough money to buy vegetables).                                                                          |
| Childhood illness                    | Include descriptions of any childhood illness other than diarrhea, fever or cough. Also include general descriptions of childhood illness (eg. "my children gets fever, diarrhea and cough" without specific details about these illnesses). |
| CI causes                            | Include descriptions of causes of childhood illnesses other than diarrhea, cough, and fever.                                                                                                                                                 |
| CI seriousness                       | Include descriptions of the seriousness of childhood illnesses other than diarrhea, cough, and fever.                                                                                                                                        |

| Code                          | Description                                                                                                                                                         |
|-------------------------------|---------------------------------------------------------------------------------------------------------------------------------------------------------------------|
| CI treatment or prevention    | Include descriptions of treatment or prevention of childhood illnesses other than diarrhea, cough, and fever.                                                       |
| Children's play area          | Include descriptions of where children in the community play, ideal play areas for children, challenges to keeping children's play area clean.                      |
| Communication channels        | Include descriptions of communication channels and where caregivers get trusted information on health and nutrition. Include reasons why these sources are trusted. |
| Community challenges          | Include descriptions of community challenges (eg. drinking, lack of space for growing food).                                                                        |
| Food-related challenges       | Include descriptions of community food-related challenges.                                                                                                          |
| Community leader role         | Include descriptions of roles and responsibilities of community leaders.                                                                                            |
| Community requests            | Include descriptions of requests from community members to the study team (eg. things that would help them in their lives such as water tanks for their community). |
| Community strengths           | Include descriptions of community strengths (eg. village welfare groups are active in the community).                                                               |
| Cough                         | Include descriptions of children suffering from cough.                                                                                                              |
| Cough causes                  | Include descriptions of the causes of cough in children.                                                                                                            |
| Cough prevention or treatment | Include descriptions of ways to prevent or treat cough in children.                                                                                                 |
| Cough seriousness             | Include descriptions of perceived seriousness of cough in children.                                                                                                 |

| Code                               | Description                                                                                                                                                         |
|------------------------------------|---------------------------------------------------------------------------------------------------------------------------------------------------------------------|
| Diarrhea                           | Include descriptions of children suffering from diarrhea.                                                                                                           |
| Diarrhea causes                    | Include descriptions of the causes of diarrhea in children.                                                                                                         |
| Diarrhea seriousness               | Include descriptions of the perceived seriousness of diarrhea in children.                                                                                          |
| Diarrhea treatment or prevention   | Include descriptions of ways to prevent or treat diarrhea in children.                                                                                              |
| Diet during pregnancy              | Include descriptions of difference in diet during pregnancy relative to normal diet. Include descriptions of foods caregivers are encouraged or discouraged to eat. |
| Drugs and alcohol during pregnancy | Include descriptions of drug, cigarette, or alcohol use during pregnancy.                                                                                           |
| Food taboos- pregnancy             | Include descriptions of food taboos during pregnancy (eg. eating octopus makes the child bald).                                                                     |
| Influences on diet- pregnancy      | Include descriptions of influences on caregivers' diet during pregnancy (eg. advice from their mothers, availability of foods in the home).                         |
| Possibility of eating fresh foods  | Include descriptions of the possibility (or lack thereof) of eating fresh foods during pregnancy if advised to do so.                                               |
| Primarily cared for                | Include descriptions of who primarily cared for the woman during pregnancy.                                                                                         |
| Risk associated with obesity       | Include descriptions of risk associated with obesity during pregnancy. Answers will mainly be from FGDs.                                                            |
| Supplements                        | Include descriptions of supplement use and compliance (eg. with iron pills).                                                                                        |

| Code                                            | Description                                                                                                                                                                                                          |
|-------------------------------------------------|----------------------------------------------------------------------------------------------------------------------------------------------------------------------------------------------------------------------|
| Diet while breastfeeding                        | Include descriptions of difference in diet while breastfeeding relative to normal diet. Include descriptions of foods caregivers are encouraged or discouraged to eat.                                               |
| Food taboos- breastfeeding                      | Include descriptions of food taboos while breastfeeding.                                                                                                                                                             |
| Influences and advice on diet-<br>breastfeeding | Include descriptions of influences on caregivers' diet while breastfeeding (eg. advice from their mothers, availability of foods in the home).                                                                       |
| Disease prevention                              | Include descriptions of how to prevent the spreading of disease, the connection between feces and illness. Include descriptions of the role of food hygiene on illness. Do not include childhood illness prevention. |
| Fever                                           | Include descriptions of children suffering from fever.                                                                                                                                                               |
| Fever causes                                    | Include descriptions of the causes of fever in children.                                                                                                                                                             |
| Fever seriousness                               | Include descriptions of the perceived seriousness of fever in children.                                                                                                                                              |
| Fever treatment or prevention                   | Include descriptions of ways to prevent or treat fever in children.                                                                                                                                                  |
| Food availability                               | Include descriptions of food availability, food shortages and coping mechanisms when there is a food shortage. Include discussions on affordability of food.                                                         |
| Food wishes                                     | Include descriptions of foods respondents wished they could eat but can't (e.g. they cannot afford it). Include descriptions of favourite foods.                                                                     |
| Food procurement                                | Include descriptions of how and from where food is acquired. Include what and how much of their foods are grown at home. Include food procured through fishing. Also include barriers to food procurement.           |

| Code                            | Description                                                                                                                                                                                |
|---------------------------------|--------------------------------------------------------------------------------------------------------------------------------------------------------------------------------------------|
| Fish consumption                | Include descriptions of fish consumed, specifically whether the fish is fresh or preserved.                                                                                                |
| Food decisions                  | Include descriptions of how food purchasing decisions and child feeding decisions are made in the home. Include descriptions of who makes the decision, whether it is a join decision etc. |
| Home production sales           | Include descriptions of how profits from selling home grown foods are commonly used.                                                                                                       |
| GEM QUOTES                      | Include quotes that capture data of interest in an exemplary way, i.e. with detailed descriptions.                                                                                         |
| Gem on child's ideal play area  |                                                                                                                                                                                            |
| Gems on animals                 |                                                                                                                                                                                            |
| Gems on breastfeeding           |                                                                                                                                                                                            |
| Gems on child feeding           |                                                                                                                                                                                            |
| Gems on child's ideal play area |                                                                                                                                                                                            |
| Gems on communication channels  |                                                                                                                                                                                            |
| Gems on defecating              |                                                                                                                                                                                            |
| Gems on diarrhea                |                                                                                                                                                                                            |
| Gems on handwashing             |                                                                                                                                                                                            |
| Gems on healthcare              |                                                                                                                                                                                            |

| Code                                  | Description                                                                                                                                                       |
|---------------------------------------|-------------------------------------------------------------------------------------------------------------------------------------------------------------------|
| Gems on healthy foods                 |                                                                                                                                                                   |
| Gems on pregnancy & supplements       |                                                                                                                                                                   |
| Gems on social norms                  |                                                                                                                                                                   |
| Health programmes                     | Include descriptions of health programs for mothers and children.                                                                                                 |
| Service delivery                      | Include descriptions of barriers and facilitators to health service delivery.                                                                                     |
| Healthcare seeking                    | Include descriptions of healthcare seeking behaviour, how caregivers make decisions about who to see for treatment first.                                         |
| Challenges to healthcare seeking      | Include descriptions of challenges to seeking healthcare for children's illnesses.                                                                                |
| Traditional vs primary healthcare     | Include description of perceptions of which is a better form of healthcare (traditional vs primary healthcare). Include relationships between the health systems. |
| Use of traditional healers & medicine | Include descriptions of the use of traditional birth attendants, herbalists, local medicine for the treatment of illness.                                         |
| Health worker role                    | Include descriptions of health worker roles and responsibilities.                                                                                                 |
| Healthy definition                    | Include descriptions of perceptions of what it means to be healthy.                                                                                               |
| Healthy adult                         | Include descriptions of appearance/signs of a healthy adult. Also include descriptions of unhealthy adults.                                                       |
| Healthy child                         | Include descriptions of appearance/signs of a healthy child under two.                                                                                            |

| Code                        | Description                                                                                                                                                                                    |
|-----------------------------|------------------------------------------------------------------------------------------------------------------------------------------------------------------------------------------------|
| Healthy lifestyle           | Include descriptions of what a healthy lifestyle entails.                                                                                                                                      |
| Healthy pregnancy           | Include description of a healthy pregnancy. Include descriptions of changes to body during pregnancy (can also include unhealthy changes). This is a question in the FGD guide.                |
| Healthy woman               | Include descriptions of what a healthy woman looks like. This is a question in the FGD guide.                                                                                                  |
| Unhealthy child             | Include descriptions of appearance/signs of an unhealthy child under two.                                                                                                                      |
| Household & community       | Include descriptions of household composition, people living together and descriptions of the community.                                                                                       |
| Influences on parenting     | Include descriptions of influences on parenting behaviour and how decisions are made about parenting. Include information and advice they wished to receive about parenting.                   |
| Local vs imported foods     | Include descriptions of local and processed foods, including difficulties to eating traditional foods. Include descriptions of the benefits of local or imported foods.                        |
| Nutrition related illnesses | Include descriptions of nutrition-related illnesses and how foods eaten affect health.                                                                                                         |
| Foods- healthy              | Include descriptions of types of foods that make the body healthy.                                                                                                                             |
| Foods- healthy for women    | Include descriptions of foods women should eat to be healthy. This is a FGD question.                                                                                                          |
| Foods- unhealthy            | Include descriptions of types of foods that make the body unhealthy.                                                                                                                           |
| Roles in raising children   | Include descriptions of who is responsible for raising children and whether these responsibilities change over time as the child grows. Include descriptions of a good father and good mother. |



| Code                      | Description                                                                                                                                                                                                                         |
|---------------------------|-------------------------------------------------------------------------------------------------------------------------------------------------------------------------------------------------------------------------------------|
| Role of community members | Include descriptions of the roles and responsibilities of community members (e.g. community leaders, neighbours etc) in raising children.                                                                                           |
| Role of grandparents      | Include descriptions of the roles and responsibilities of grandparents in raising children and whether these responsibilities change over time as the child grows. Include descriptions of a good grandfather and good grandmother. |
| Role of siblings          | Include descriptions of the roles and responsibilities that siblings have in raising children.                                                                                                                                      |
| Time spent outside home   | Include descriptions of how caregivers spend time outside of the home. Include how time spent outside of home impacts child nutrition and hygiene.                                                                                  |
| Toilet use                | Include descriptions of type of toilet in the home and reasons why this toilet type is used.                                                                                                                                        |
| Open defecation           | Include descriptions of the practice of open defecation and how common it is. Include reasons why this practice exists in some places but not in others.                                                                            |
| Young children's stool    | Include descriptions of how young children's stool is disposed of (stools of babies, young children).                                                                                                                               |
| Typical meal              | Include descriptions of foods families typically eat, how they cook/prepare the food, and who prepares the food.                                                                                                                    |
| Favouritism               | Include descriptions of whether one child receives more food than another, or if certain family members receive more food than others.                                                                                              |
| Food sharing              | Include descriptions of food sharing, including food sharing between family members (eg. on one plate) and between households.                                                                                                      |

| Code                                      | Description                                                                                                                                                                        |
|-------------------------------------------|------------------------------------------------------------------------------------------------------------------------------------------------------------------------------------|
| Washing hands                             | Include descriptions of where, how often and how hands are washed. Include washing hands with and without soap.                                                                    |
| Barriers to handwashing                   | Include descriptions barriers to handwashing. Include also barriers to soap use.                                                                                                   |
| Facilitators of handwashing               | Include descriptions of facilitators of handwashing. Include also facilitators of soap use.                                                                                        |
| Influences on handwashing                 | Include descriptions of what influences caregivers' decision to use or not use soap, (eg. social norms like "nobody uses soap" or children learning about handwashing in schools). |
| Knowledge of soap                         | Include descriptions of the perceived importance of using soap (eg. the difference between using water vs water and soap).                                                         |
| Water acquiring                           | Include descriptions of how people get and store water.                                                                                                                            |
| Difficulties in getting and storing water | Include descriptions of any difficulties people face in getting and storing water (eg. well is far from home, well is salty).                                                      |
| Water treatment                           | Include descriptions of how caregivers treat water to make it safe for drinking. Also include any descriptions of caregivers not treating water to make it safe to drink.          |
| Women's illnesses                         | Include descriptions of common illnesses of women and which ones women are most concerned about.                                                                                   |
| Anaemia                                   | Include descriptions of anaemia and its seriousness.                                                                                                                               |
| Anaemia advice                            | Include descriptions of what advice women receive about anaemia (eg. from health workers or family members). Include descriptions of treatment or prevention advice.               |
