# Supplementary material for: Socio-Ecological Factors That Influence Infant and Young Child Nutrition in Kiribati: A Biocultural Perspective
Source: MDPI journal article supplement (doi:10.3390/nu11061330), 2019-06-13
Supplement: s1 [file s1]

## Household Observation Form

### Oral Assent to Participate in Household Observation for Formative Research on Nutrition and Water, Sanitation, and Hygiene Norms and Practices in Kiribati

**Name of Investigators:** Ministry of Health and Medical Services and Nourish Global Nutrition Inc  
**Study Sponsors:** UNICEF

---

Hello, how are you doing? We want to talk to you about a research study we are doing. A research study is a way to learn information about something. We would like to find out more about your household's eating and food-related behaviors. We are asking you to join the study because you were identified by your community leader as someone who has a child aged 6 – 23 months in this community.

If you agree to join this study, then your household, including your child 6 – 23 months, will be observed during the day. I am especially interested to understand what, how much, and how your household eats throughout a typical meal. There is a chance that my observation will make you or your child uncomfortable but I will do my best to not interrupt any of your normal activities and you may ask me to leave anytime.

We do not know if you will be helped by being in this study. However, we hope to learn something that will help us to develop a nutrition program that will help improve the health and nutrition of other households in this community.

You do not have to join this study. It is up to you. You can say okay now, and you can change your mind later. All you have to do is tell us. No one will be mad at you if you change your mind.

If you have any questions or problems with this work or with your experience while participating in this study, you may ask the Nourish research team or the Ministry of Health staff on this project.

Do you agree to participate and to allow your child to participate? Permission given: Yes\_\_ No \_\_

[illegible]

**Part II. Direct Observation Table** (Fill out as you do data collection, with a minimum entry of ‘what happened’ no less frequently than every 10 minutes)

[illegible]



[illegible]



[illegible]

1. In this household, describe the infant and young child feeding practices.
2. In this household, describe the WASH practices.
3. In this household, describe the food sharing. Are there predictable patterns?
4. In this household, who is favored and how is this favoritism expressed?
