# Supplementary material for: Socio-Ecological Factors That Influence Infant and Young Child Nutrition in Kiribati: A Biocultural Perspective
Source: Nutrients. 2019 Jun 13;11(6):1330. doi: 10.3390/nu11061330 (PMC6627610; doi:10.3390/nu11061330)
Supplement: Supplementary file 1 [file nutrients-11-01330-s001.zip]

Archive with 7 entries (7 files):
- S7. Textual analysis codebook.pdf
- S1. In-depth Interview Guide - Community Leader.pdf
- S2. In-depth Interview Guide - Primary Caregiver.pdf
- S3. In-depth Interview Guide - Male Caregiver.pdf
- S4. In-depth Interview Guide - Health Worker.pdf
- S5. In-depth Interview Guide - Senior-level Health Staff.pdf
- S6. Household Observation Form.pdf
